# Supplementary material
Source: PubMed Central journal article supplement (PMC7383282)
Supplement: jin-0012-0291-s03.pdf [file jin-0012-0291-s03.pdf]

**Supplementary Table 1. Whole genome statistics.**

| <b>Strain</b>     | <b>Designation in<br/>BioProject</b> | <b>CDS</b> | <b>bases</b> | <b>contigs</b> | <b>rRNA</b> | <b>repeat_region</b> | <b>tRNA</b> | <b>tmRNA</b> |
|-------------------|--------------------------------------|------------|--------------|----------------|-------------|----------------------|-------------|--------------|
| <b>2603VR</b>     |                                      | 2108       | 2160267      | 1              | 21          | 1                    | 80          | 1            |
| <b>4012</b>       | 4012                                 | 1911       | 1973009      | 21             | 5           | 1                    | 50          | 1            |
| <b>6051</b>       | 6051                                 | 2002       | 2025758      | 22             | 5           | 1                    | 50          | 1            |
| <b>6061</b>       | 6061                                 | 2108       | 2192319      | 57             | 10          | 1                    | 60          | 1            |
| <b>Cervix</b>     | Cervix                               | 1930       | 1980117      | 40             | 5           | 1                    | 50          | 1            |
| <b>STSS/NF_HH</b> | NF-HH                                | 1975       | 2031370      | 31             | 5           | 2                    | 51          | 1            |
| <b>STSS/NF_LH</b> | NF-LH                                | 1976       | 2031559      | 32             | 5           | 2                    | 51          | 1            |
| <b>LUMC16</b>     | STSS                                 | 2024       | 2090368      | 53             | 5           | 1                    | 50          | 1            |
| <b>Urine</b>      | Urine                                | 2147       | 2177934      | 29             | 5           | 1                    | 50          | 1            |
| <b>Wound</b>      | Wound                                | 2029       | 2060451      | 35             | 5           | 2                    | 52          | 1            |
