# Supplementary material
Source: PubMed Central journal article supplement (PMC7383282)
Supplement: jin-0012-0291-s04.pdf [file jin-0012-0291-s04.pdf]

**Supplementary Table 4. Genetic analysis of the CovR/S region**

| <b>SAMPLE</b>     | <b>CovR</b>                  | <b>CovS</b>                  |
|-------------------|------------------------------|------------------------------|
| <b>STSS/NF_LH</b> | ∅                            | ∅                            |
| <b>2603VR</b>     | ∅                            | ∅                            |
| <b>Wound</b>      | ∅                            | ∅                            |
| <b>Cervix</b>     | ∅                            | ∅                            |
| <b>LUMC16</b>     | ∅                            | ∅                            |
| <b>6051</b>       | ∅                            | ∅                            |
| <b>STSS/NF_HH</b> | V <sub>30</sub> <sup>-</sup> | ∅                            |
| <b>4012</b>       | ∅                            | ∅                            |
| <b>Urine</b>      | ∅                            | V <sub>85</sub> <sup>I</sup> |
