# Supplementary material
Source: PubMed Central journal article supplement (PMC7383282)
Supplement: jin-0012-0291-s05.pdf [file jin-0012-0291-s05.pdf]

**Supplementary Table 5. Genetic analyses of the *Cyl*-operon**

| LocT    | LUMC16             | STSS/NF_HH         | other        |
|---------|--------------------|--------------------|--------------|
| SAG0662 | ∅                  | ∅                  | -            |
| SAG0663 | ∅                  | ∅                  | -            |
| SAG0664 | ∅                  | ∅                  | 4012         |
| SAG0667 | ∅                  | ∅                  | -            |
| SAG0668 | ∅                  | ∅                  | 4012, Cervix |
| SAG0669 | ∅                  | ∅                  | 4012         |
| SAG0670 | ∅                  | ∅                  | Cervix       |
| SAG0671 | ∅                  | ∅                  | 4012         |
| SAG0672 | T <sub>186</sub> P | T <sub>186</sub> P | 4012         |
| SAG0673 | ∅                  | ∅                  | 4012         |
